# Supplementary material for: Identification of non-essential loci within the Meleagrid herpesvirus 1 genome
Source: Springer Nature journal article supplement (doi:10.1186/s12985-015-0362-9), 2015-08-25

**Supplemental Table S1: Details of transposon gene interruptions into the MeHV-1 infectious clone pMeHV1-C18.**

The clone name, gene designation and nucleotide position of the transposon insertion are detailed. Insertion locations were mapped to the MeHV-1 reference genome sequence [Genbank: NC\_002641.1]. The orientation of the transposon insertion into the parent iBAC genome, either forward (+) or reverse (-) in respect to the MeHV-1 reference genome sequence, was determined by DNA sequencing. Insertions within repeat regions of Tn5 insertion clones were further characterised by restriction enzyme analysis with *SbfI* and *FseI*.

| <b>Gene/ element</b>  | <b>Clone</b> | <b>Nucleotide position (+/-)</b> |
|-----------------------|--------------|----------------------------------|
| <i>vLip</i> (HVT005)  | MuAΔ38       | 7047-7051 (+)                    |
| <i>LORF2</i> (HVT007) | MuAΔ30       | 9327-9331 (+)                    |
| <i>UL6</i>            | MuAΔ75       | 17747-17751 (+)                  |
|                       | MuAΔ73       | 17873-17877 (+)                  |
| <i>UL8</i>            | MuAΔ58       | 20160-20164 (-)                  |
| <i>UL9</i>            | Tn5Δ2        | 22352-22360 (+)                  |
|                       | MuAΔ29       | 23883-23887 (-)                  |
| <i>UL10</i>           | MuAΔ28       | 25857-25861 (+)                  |
|                       | MuAΔ48       | 26030-26034 (+)                  |
| Intergenic            | MuAΔ74       | 26188-26192 (+)                  |
| <i>UL13</i>           | MuAΔ69       | 28881-28885 (+)                  |
| <i>UL17</i>           | MuAΔ27       | 32633-32637 (+)                  |
|                       | Tn5Δ12       | 33504-33512 (-)                  |
|                       | MuAΔ32       | 34287-34291 (-)                  |
| <i>UL19</i>           | MuAΔ66       | 40885-40889 (+)                  |
| <i>UL21</i>           | MuAΔ37       | 42375-42379 (+)                  |
|                       | Tn5Δ14       | 42635-42643 (-)                  |
|                       | MuAΔ41       | 43080-43084 (-)                  |
| <i>UL26</i>           | MuAΔ53       | 50761-50765 (-)                  |
| <i>UL26.5</i>         | MuAΔ31       | 51870-51874 (-)                  |
| <i>UL27</i>           | MuAΔ43       | 53097-53101 (-)                  |
|                       | MuAΔ64       | 54786-54790 (+)                  |
|                       | MuAΔ33       | 55039-55043 (-)                  |
| <i>UL29</i>           | Tn5Δ7        | 58098-58106 (+)                  |
|                       | MuAΔ26       | 59940-59944 (-)                  |
| Intergenic            | MuAΔ40       | 68440-68444 (+)                  |
| <i>UL36</i>           | MuAΔ81       | 72199-72203 (+)                  |
|                       | MuAΔ52       | 72288-72292 (-)                  |
|                       | MuAΔ79       | 78147-78151 (-)                  |
| <i>UL37</i>           | Tn5Δ6        | 80288-80296 (+)                  |
| <i>UL39</i>           | Tn5Δ23       | 86217-86225 (-)                  |
| <i>UL40</i>           | Tn5Δ18       | 87217-87225 (+)                  |
| Intergenic            | MuAΔ35       | 89528-89532 (-)                  |
| <i>UL42</i>           | MuAΔ42       | 90563-90567 (+)                  |
| <i>UL47</i>           | MuAΔ80       | 98798-98802 (-)                  |
| Intergenic            | MuAΔ61       | 99684-99688 (+)                  |
| <i>UL48</i>           | MuAΔ71       | 99923-99927 (+)                  |

|                                                      |                                                                                                                        |                                                                                                                                                                                                                                                                                                                         |
|------------------------------------------------------|------------------------------------------------------------------------------------------------------------------------|-------------------------------------------------------------------------------------------------------------------------------------------------------------------------------------------------------------------------------------------------------------------------------------------------------------------------|
|                                                      | MuAΔ72                                                                                                                 | 100650-100654 (-)                                                                                                                                                                                                                                                                                                       |
| <i>UL52</i>                                          | Tn5Δ17<br>MuAΔ57<br>MuAΔ67                                                                                             | 105088-105096 (+)<br>105362-105366 (-)<br>105424-105428 (-)                                                                                                                                                                                                                                                             |
| <i>UL53</i>                                          | MuAΔ68                                                                                                                 | 108699-108703 (-)                                                                                                                                                                                                                                                                                                       |
| Intergenic                                           | MuAΔ60<br>MuAΔ77                                                                                                       | 108914-108918 (-)<br>111349-111353 (-)                                                                                                                                                                                                                                                                                  |
| <i>LORF4A</i><br>( <i>HVT067</i> )                   | Tn5Δ10                                                                                                                 | 113752-113760 (-)                                                                                                                                                                                                                                                                                                       |
| <i>LORF5</i><br>( <i>HVT069</i> )                    | MuAΔ59<br>MuAΔ82                                                                                                       | 115165-115169 (+)<br>115602-115606 (-)                                                                                                                                                                                                                                                                                  |
| Intergenic                                           | MuAΔ63<br><br>MuAΔ54<br><br>MuAΔ55                                                                                     | 3898-3902 or<br>119785-119789 (ND)<br>1933-1937 or<br>121750-121754 (ND)<br>124295-124299 or<br>158297-158301 (ND)                                                                                                                                                                                                      |
| <i>vNR13</i><br>( <i>HVT079</i> /<br><i>HVT096</i> ) | MuAΔ46                                                                                                                 | 124989-124993 or<br>157603-157607                                                                                                                                                                                                                                                                                       |
| <i>icp4</i><br>( <i>HVT080</i> /<br><i>HVT095</i> )  | MuAΔ34<br><br>MuAΔ78<br><br>MuAΔ47<br><br>Tn5Δ19<br>MuAΔ83<br><br>Tn5Δ22<br>Tn5Δ4<br>Tn5Δ1<br>Tn5Δ3<br>Tn5Δ11<br>Tn5Δ8 | 128905-128909 or<br>153687-153691 (ND)<br>129979-129983 or<br>152612-152617 (ND)<br>130476-130480 or<br>152116-152120 (ND)<br>130947-130955 (+)<br>131154-131158 or<br>151438-151442 (ND)<br>132257-132365 (-)<br>149786-149794 (+)<br>151300-151308 (-)<br>153044-153052 (-)<br>154273-154281 (+)<br>154730-154738 (+) |
| Intergenic                                           | MuAΔ56<br><br>MuAΔ25<br><br>MuAΔ51<br><br>MuAΔ44<br><br>MuAΔ50                                                         | 133260-133264 or<br>149332-149336 (ND)<br>134298-134302 or<br>148294-148298 (ND)<br>134546-134550 or<br>148046-148050 (ND)<br>135789-135793 or<br>146803-146807 (ND)<br>135863-135867 or<br>146729-146733 (ND)                                                                                                          |
| <i>US3</i>                                           | MuAΔ70<br>MuAΔ45                                                                                                       | 141220-141224 (+)<br>141654-141658 (+)                                                                                                                                                                                                                                                                                  |
| <i>US6</i>                                           | MuAΔ49                                                                                                                 | 143203-143207 (-)                                                                                                                                                                                                                                                                                                       |
| <i>US8</i>                                           | Tn5Δ13<br>Tn5Δ21                                                                                                       | 145780-145788 (-)<br>145937-145945 (+)                                                                                                                                                                                                                                                                                  |

|                     |                  |                                        |
|---------------------|------------------|----------------------------------------|
|                     | MuAΔ76           | 136053-135057 or<br>146539-146543 (ND) |
| Intergenic          | Tn5Δ24           | 156371-156379 (-)                      |
| a-like<br>sequences | Tn5Δ16<br>Tn5Δ20 | Not determined                         |
|                     | MuAΔ65<br>MuAΔ84 | BAC vector sequences                   |

Supplemental Table S2: **Oligonucleotides used in this study.**

| Oligonucleotide | Sequence (5' → 3')                     |
|-----------------|----------------------------------------|
| <KAN2> FP1      | ACCTACAACAAAGCTCTCATCAACC              |
| KanMEFwd        | CTCCTTCATTACAGAAACGGC                  |
| <KAN2> RP1      | GCAATGTAACATCAGAGATTTTGAG              |
| KanMERev        | ACAATCGATAGATTGTGCGCAC                 |
| HVT27Fwd        | CGAAAGCGGATAACCAGAAC                   |
| HVTFrag5Rev     | AAATCGCCATTTTACGCATC                   |
| KanRMfeIFwd     | TGAGTTAACGTCGGTTGATGAGAGCTTTGTTGTAGGTG |
| GFPseq          | CGTCGCCGTCCAGCTCGACCAG                 |
| ECGFPH Fwd      | G TTCCTAAGCTTTTGCTGGCCTTTTGCTCACATGT   |

Supplemental Figure S1: **Primary chicken embryo fibroblasts (CEFs) were used as a negative control**

Primary chicken embryo fibroblasts (CEFs) were monitored as a negative control to assess the replication capacity of transposition mutants in cell culture. Day 7 of passage 1 a: brightfield ×100; and b: fluorescent microscopy ×100

### Uninfected

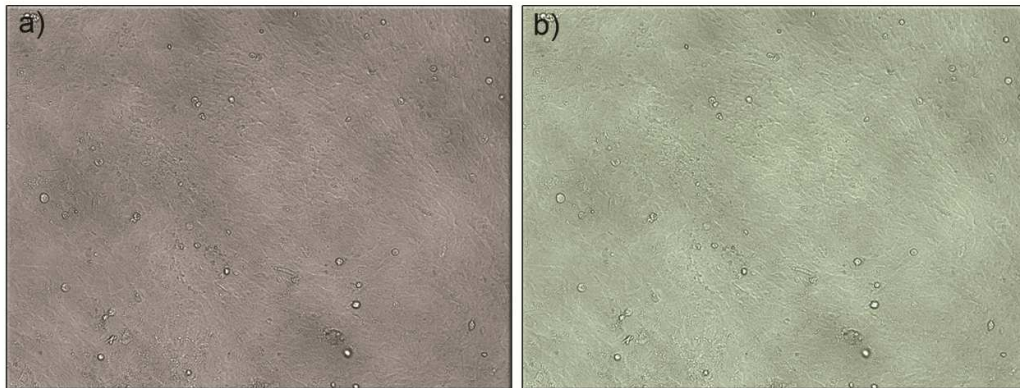

Supplement: MOESM1 [file 9770314]
